# Supplementary material for: Katanin p80, NuMA and cytoplasmic dynein cooperate to control microtubule dynamics
Source: PubMed Central journal article supplement (PMC5228124; doi:10.1038/srep39902), 2017-01-12

## Supplementary Information

### **Katanin p80, NuMA and cytoplasmic dynein cooperate to control microtubule dynamics**

Mingyue Jin<sup>1,\*</sup>, Oz Pomp<sup>2,\*</sup>, Tomoyasu Shinoda<sup>5</sup>, Shiori Toba<sup>1</sup>, Takayuki Torisawa<sup>6,7</sup>, Ken'ya Furuta<sup>6,7</sup>, Kazuhiro Oiwa<sup>6,7,8</sup>, Takuo Yasunaga<sup>9,10,11</sup>, Daiju Kitagawa<sup>12</sup>, Shigeru Matsumura<sup>13</sup>, Takaki Miyata<sup>5</sup>, Thong Teck Tan<sup>2</sup>, Bruno Reversade<sup>2,3,4,#</sup> and Shinji Hirotsune<sup>1,#</sup>

1. Department of Genetic Disease Research, Osaka City University, Graduate School of Medicine, Asahi-machi 1-4-3, Abeno, Osaka 545-8585, Japan
2. Institute of Medical Biology, Human Genetics and Embryology Laboratory, Singapore
3. Institute of Molecular and Cellular Biology, A\*STAR, Singapore 138648, Singapore
4. Department of Paediatrics, National University of Singapore, Singapore 119260, Singapore
5. Department of Anatomy and Cell Biology, Nagoya University Graduate School of Medicine, 65 Tsurumai, Showa, Nagoya 466-8550, Japan
6. Advanced ICT Research Institute, National Institute of Information and Communications Technology, Kobe, Hyogo 651-2492, Japan
7. CREST, Japan Science and Technology Agency, Chiyoda-ku, Tokyo 102-0076, Japan
8. Graduate School of Life Science, University of Hyogo, Harima Science Park City,

Hyogo 678-1297, Japan

9. Department of Bioscience and Bioinformatics, Faculty of Computer Science and Systems Engineering, Kyushu Institute of Technology, Kawazu 680-4, Iizuka, Fukuoka 820-850, Japan
10. JST-SENTAN, 4-1-8, Honcho, Kawaguchi, Saitama 332-0012, Japan
11. JST-CREST, 4-1-8, Honcho, Kawaguchi, Saitama 332-0012, Japan
12. Division of Centrosome Biology, Department of Molecular Genetics, National Institute of Genetics, 1111 Yata, Mishima, Shizuoka, 411-8540, Japan
13. Department of Cell Biology, Institute for Virus Research, Kyoto University, Sakyo-ku, Kyoto, 606-8507, Japan

\*: These authors contributed equally to this work.

#: Co-senior author

Correspondence should be addressed to: Bruno Reversade or Shinji Hirotsune

Bruno Reversade:

Tel: (+65) 8282 5711

Fax: (+65) 6464 2006

e-mail: [bruno@reversade.com](mailto:bruno@reversade.com)

Shinji Hirotsune:

Tel: +81-6-6645-3725

Fax: +81-6-6645-3727

e-mail: [shinjih@med.osaka-cu.ac.jp](mailto:shinjih@med.osaka-cu.ac.jp)

## Supplementary Figure Legends

**Supplementary Figure S1. P80 co-localized with NuMA.** (a) To identify new p80 interaction partners, immunoprecipitation was performed with anti-p80 antibody<sup>23</sup> and mouse embryonic brain lysate. Co-precipitated proteins (left) were treated with trypsin to generate peptides. The resulting tryptic peptides were fractionated with a cation exchange column using several different concentrations of KCl (10, 50, 70, 100, 200 and 350 mM). The peptide fractions were resuspended in 25  $\mu$ l of 0.1% formic acid and subjected to LC-MS/MS analysis using Analyst QS Software 2.0 (AB Sciex) in the positive-ion mode. Identified peptides were analyzed with ProteinPilot using the NCBI database (RefSeq, release 61, September, 2013, <http://www.ncbi.nlm.nih.gov/news/09-18-2013-refseq-release61/>). The minimum threshold for protein identification was set at a protein score of 0.47, which corresponds to a confidence level greater than 66% (Supplementary Table S1). The listed proteins were identified from our analyzed results as strong candidates to interact with p80. (b) p80 expression in interphase HeLa cell. p80 is expressed in both the cytoplasm and nucleus. Scale bar, 10  $\mu$ m. (c) Migrating granular cells isolated from postnatal day 3 mouse pups. Scale bar, 100  $\mu$ m. (d,e) p80 and NuMA expression in migrating granular cells. Magenta rectangle-surrounded areas in (d) and (e) were enlarged and are presented in the lower panels. Both proteins were expressed in the cytoplasm and nuclei in migrating neurons. Scale bar, 10  $\mu$ m. (f,g) 3D analysis of co-localization of p80 with NuMA (f) and pericentrin (g) using Imaris software. Scale bar, 2  $\mu$ m. (h,i) The silencing effect of p80 and NuMA siRNAs in granular cells. siRNAs against mouse p80 (f) or NuMA (g) were also assessed for their effects in granular cells. Lower quantitative graphs ( $n = 3$ ) indicate that siRNAs also effectively decreased p80 (f) or NuMA (g)

expression in neuronal cells.  $\beta$ -actin was used as a loading control. *P*-values were calculated with Student's *t*-test, mean  $\pm$  s.e., \*\*\* *P* < 0.001.

**Supplementary Figure S2. Defective mitosis caused by p80 or NuMA depletion in MEF cells.** (a-e) Aberrant mitotic phenotypes of MEF cells treated with siRNAs against p80 (a,b), NuMA (c,d) or both (e). siRNA treated cells were stained with anti- $\gamma$  tubulin antibody (green) to probe centrosomes/spindle poles and anti- $\beta$  tubulin antibody (red) to probe MT skeletons. In (a) and (c), cells with the depletion of the indicated target proteins exhibited multipolar (upper panels) and monopolar (middle panels) spindles, accompanied by cytokinesis defects (lower panels). (b), (d) and (e) present image galleries of aberrant mitotic phenotypes as indicated. (f) Aberrant centrosomal duplication in p80 or NuMA siRNA treated interphase MEF cells. Rectangle-surrounded centrosomes were enlarged and are presented as insets. (g) Rescue of aberrant centrosomal duplication by co-transfection of NuMA siRNA with hNuMA-GFP (lower) or p80 siRNA with GFP-hp80 (upper). Rectangle-surrounded centrosomes were enlarged and are presented as insets. (h) Quantitative data for (f) and (g). In each case, 100 siRNA treated cells were subjected to the analysis. Indicated *P* values were calculated via ANOVA, mean  $\pm$  s.e., \*\* *P* < 0.01, \*\*\* *P* < 0.001. Scale bar, 10  $\mu$ m.

**Supplementary Figure S3. Mitotic abnormalities in patient-derived iPSCs.** (a) Collapsed mitotic spindles resulted in monoaster formation. (b) Staining of monoaster cell with the indicated antibodies. (c) Delayed metaphase in patient iPSCs ( $\Delta$ 1-56 aa). Prophase lengths in control and patient iPSCs were captured via live cell imaging. DNA is visualized by Hoechst; mitotic cells are indicated with red arrowheads. Quantitative

graph is presented in Fig. 3g. **(d)** Aborted cytokinesis in patient-derived iPSCs ( $\Delta 1-56$  aa). **(e)** Asymmetric distribution of chromosomes during mitosis in patient-derived iPSCs ( $\Delta 1-56$  aa). Yellow arrowheads indicate mitotic poles; green arrowheads indicate DNA. Scale bar, 10  $\mu\text{m}$ .

**Supplementary Figure S4. Staining of normal mini-brain for the indicated markers.**

**(a)** Patient (c. 1A>G,  $\Delta 1-56$  aa)  $^{18}$ -derived iPSCs differentiated into a homogeneous population of Nestin<sup>+</sup> NPCs used for cell motility (Supplementary Video 14). Scale bar, 50  $\mu\text{m}$ . **(b)** Differentiated normal mini-brain (left) exhibited distinctive fields with proliferating cells (PF) or quiescent neurons (QF) (right). Scale bars, 500  $\mu\text{m}$  for left image and 100  $\mu\text{m}$  for right image. **(c)** PF and QF were probed with the indicated antibodies. Rectangle-surrounded areas were magnified below. Scale bar, 50  $\mu\text{m}$ . PF, proliferating field; QF, quiescent field; L, lumen; MT, microtubule.

**Supplementary Figure S5. Full-length p80 is essential for aster formation in an ATP-**

**dependent manner.** **(a)** Without ATP, cytoplasmic dynein also has an MT-bundling effect. **(b)** Triple combination of p80, NuMA and dynein in an ATP-absent condition completely failed to form asters. Square-surrounded area was enlarged and is presented on the right side. **(c)** p80 1-314 aa (an N-terminal WD40 repeat domain that interacts with dynein) did not interact with MTs. **(d)** Double combination of p80 1-314 aa and dynein resulted in large and irregular MT clusters. **(e)** Triple combination of p80 1-314 aa, dynein and NuMA has no ability to make aster-like structures. Scale bars, 20  $\mu\text{m}$  in **(a and c,d)** and 100  $\mu\text{m}$  in **(b and e)**.

## Supplementary Video Legends

**Supplementary Video 1: *In vitro* MT gliding assay.** Dynein molecules smoothly transport MTs (white) in 1 mM ATP-containing conditions. Scale bar, 10  $\mu\text{m}$ .

**Supplementary Video 2: Effect of p80 on dynein motility.** MT-gliding activity of dynein was completely inhibited by the addition of p80. Scale bar, 10  $\mu\text{m}$ .

**Supplementary Video 3: Effect of p80  $\Delta$ 1-56 aa on dynein motility.** MT-gliding activity of dynein was not affected by p80 N-terminal truncated form  $\Delta$ 1-56 aa. Scale bar, 10  $\mu\text{m}$ .

**Supplementary Video 4: Effect of p80 p.G33W on dynein motility.** MT-gliding activity of dynein was not affected by the addition of p80 point mutation p.G33W. Scale bar, 10  $\mu\text{m}$ .

**Supplementary Video 5: Effect of p80 p.S535L on dynein motility.** MT-gliding activity of dynein was inhibited by the addition of p80 point mutation p.S535L. Scale bar, 10  $\mu\text{m}$ .

**Supplementary Video 6: Effect of p80 p.L540R on dynein motility.** MT-gliding activity of dynein was inhibited by the addition of p80 p.L540R. Scale bar, 10  $\mu\text{m}$ .

**Supplementary Video 7: Normal mitotic iPSCs probed by DNA.** Normal mitotic iPSCs were identified by probing DNA with Hoechst.

**Supplementary Video 8:** Prolonged prophase length in patient (c. 1A>G, Δ1-56 aa)<sup>18</sup> iPSC. DNA and MTs were visualized with Hoechst (blue) and SiR-tubulin (red), respectively.

**Supplementary Video 9: Aborted cytokinesis in patient-derived iPSC.** Reversal of chromosome condensation was identified in patient (c. 1A>G, Δ1-56 aa)<sup>18</sup> iPSCs. DNA and MTs were visualized with Hoechst (blue) and SiR-tubulin (red), respectively.

**Supplementary Video 10: Spindle is collapsed into monoaster.** Monoaster formation results from collapsed mitotic spindle in patient (c. 1A>G, Δ1-56 aa)<sup>18</sup> iPSC.

**Supplementary Video 11: Control human wild type neural progenitor cells (NPCs) for investigation of apoptosis.** Cell nuclei were probed with pLVX-H2B-mCherry (red), and cytoplasm was visualized with TUB GFP-Puro (green). Cells were observed for 10 h at 5-min intervals. In wild type cells, there were no detectable apoptotic cells. Scale bar, 20 μm.

**Supplementary Video 12: Apoptotic cells in patient-derived NPCs.** Cell nuclei and cytoplasm were probed as described in Video 7. After 4 h of observation, patient-derived cells (c. 1A>G, Δ1-56 aa)<sup>18</sup> began to undergo apoptosis (lower right), as demonstrated by the nuclear fragmentation. Scale bar, 20 μm.

**Supplementary Video 13: *In vitro* cell motility using human wild type NPCs.** Actively

moving NPCs were observed in healthy neural progenitor cells. Scale bar, 20  $\mu\text{m}$ .

**Supplementary Video 14: *In vitro* cell motility of patient-derived p80 depletion NPCs.**

Clearly impaired cell movements were identified in p80 depletion neural progenitor cells (c. 1A>G,  $\Delta$ 1-56 aa)<sup>18</sup>. Scale bar, 20  $\mu\text{m}$ .

**Supplementary Video 15: *In vitro* aster mimic structure constructed by p80, NuMA**

**and dynein.** p80, NuMA, and cytoplasmic dynein with ATTO-565 labeled MTs formed an aster mimic structure in an ATP-dependent manner. Scale bar, 20  $\mu\text{m}$ .

## **Supplementary Table Legend**

**Supplementary Table S1.** Spectra of one peptide ID in the katanin p80 interactome listed in Supplementary Fig. S1a.



Jin and Pomp et al., Supplementary Figure S1:

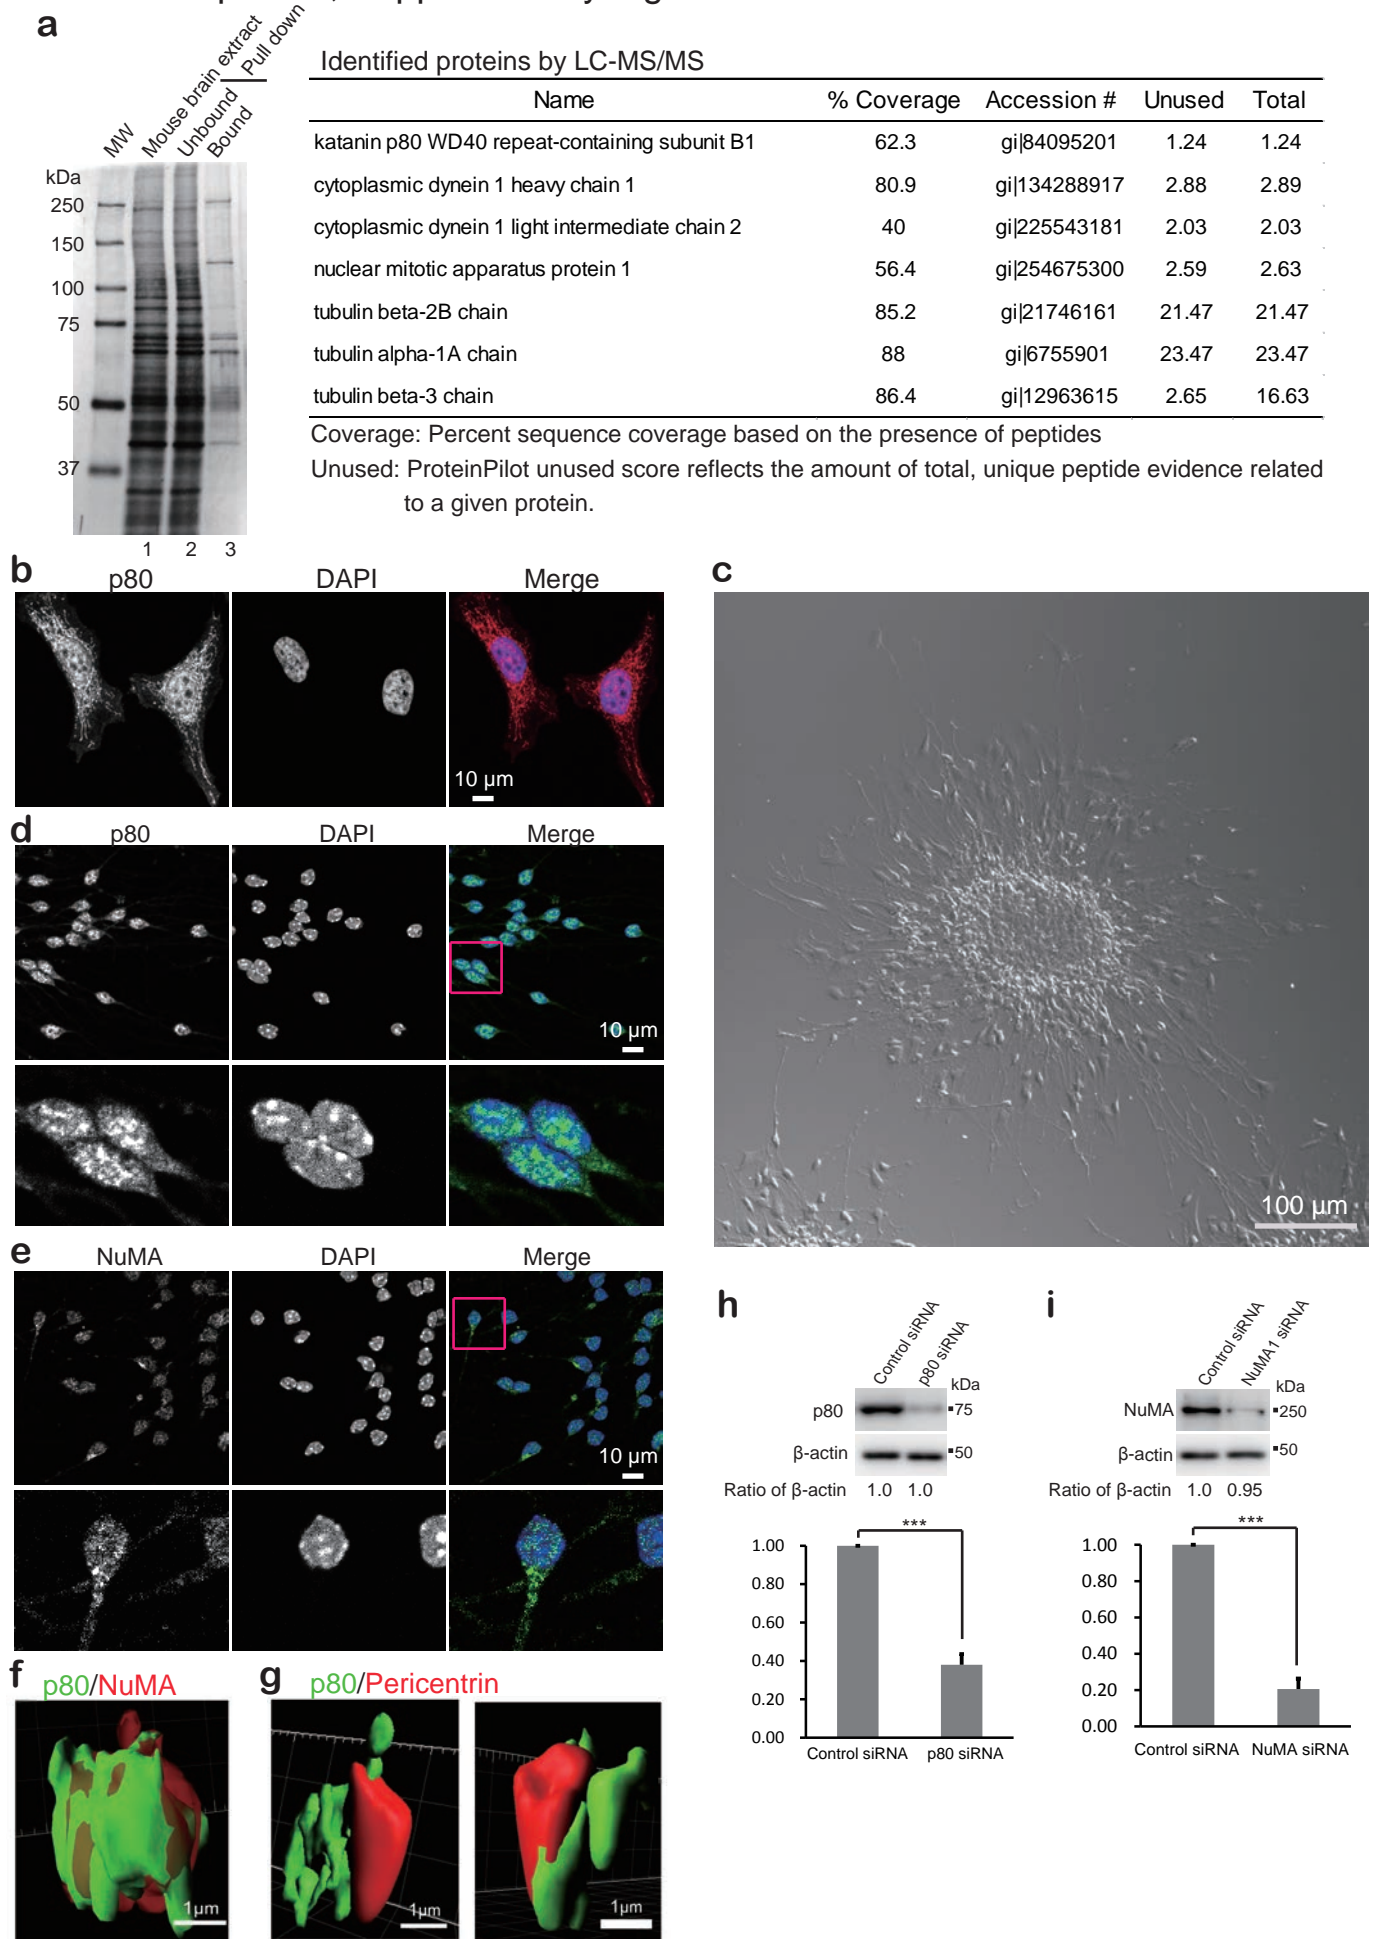

Jin and Pomp et al., Supplementary Figure S2:

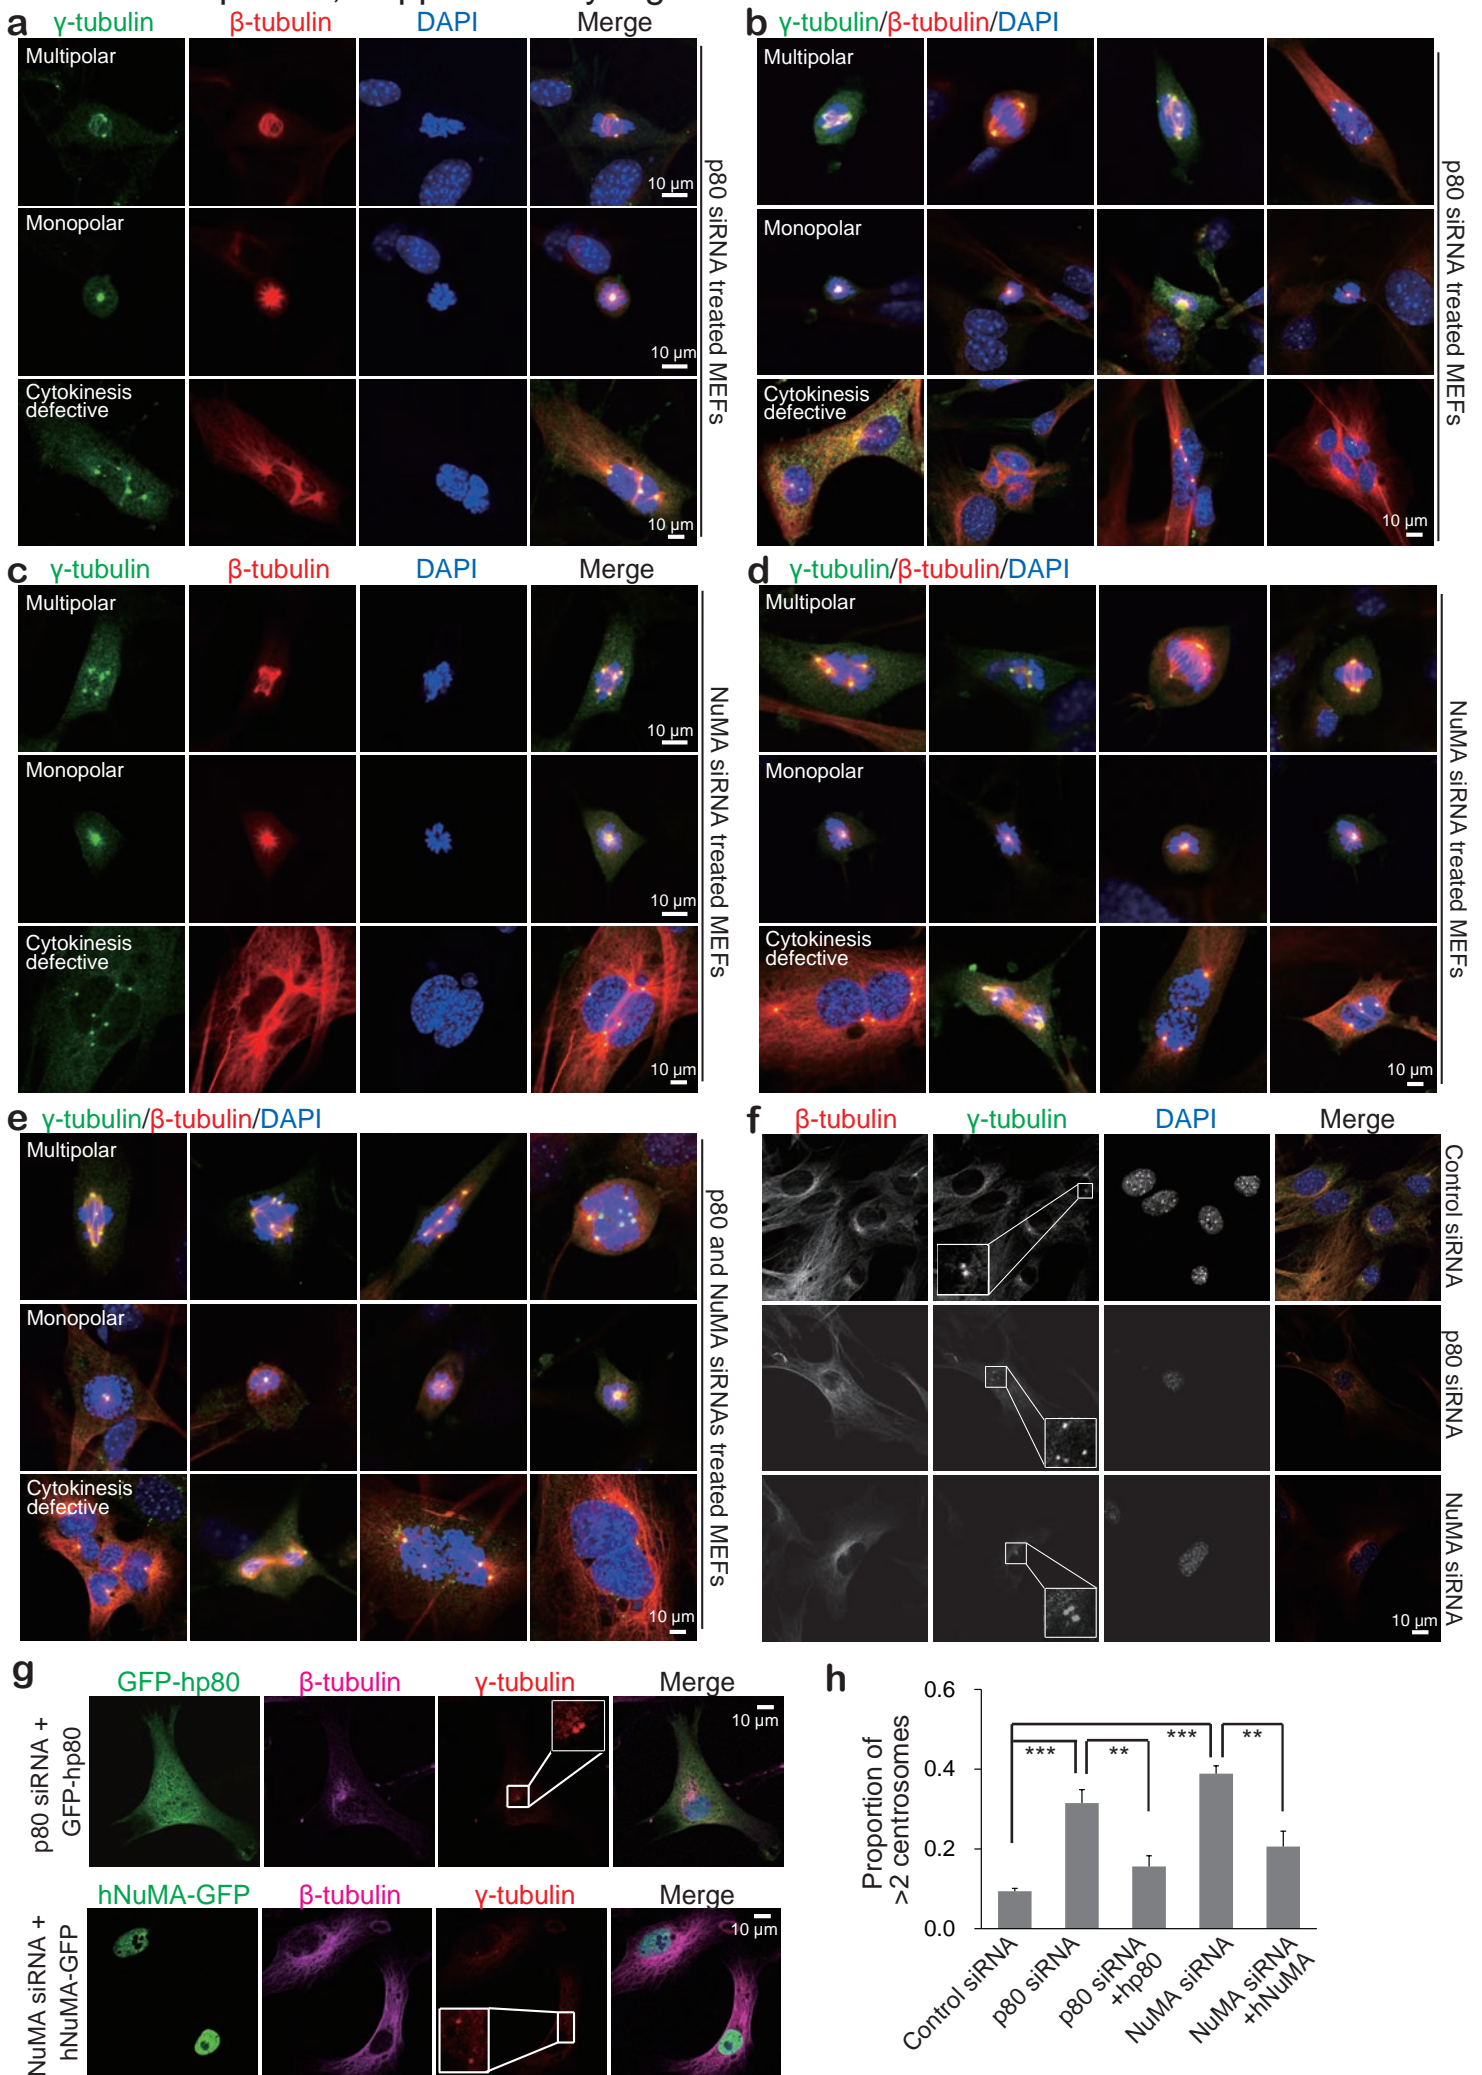

Jin and Pomp et al., Supplementary Figure S3:

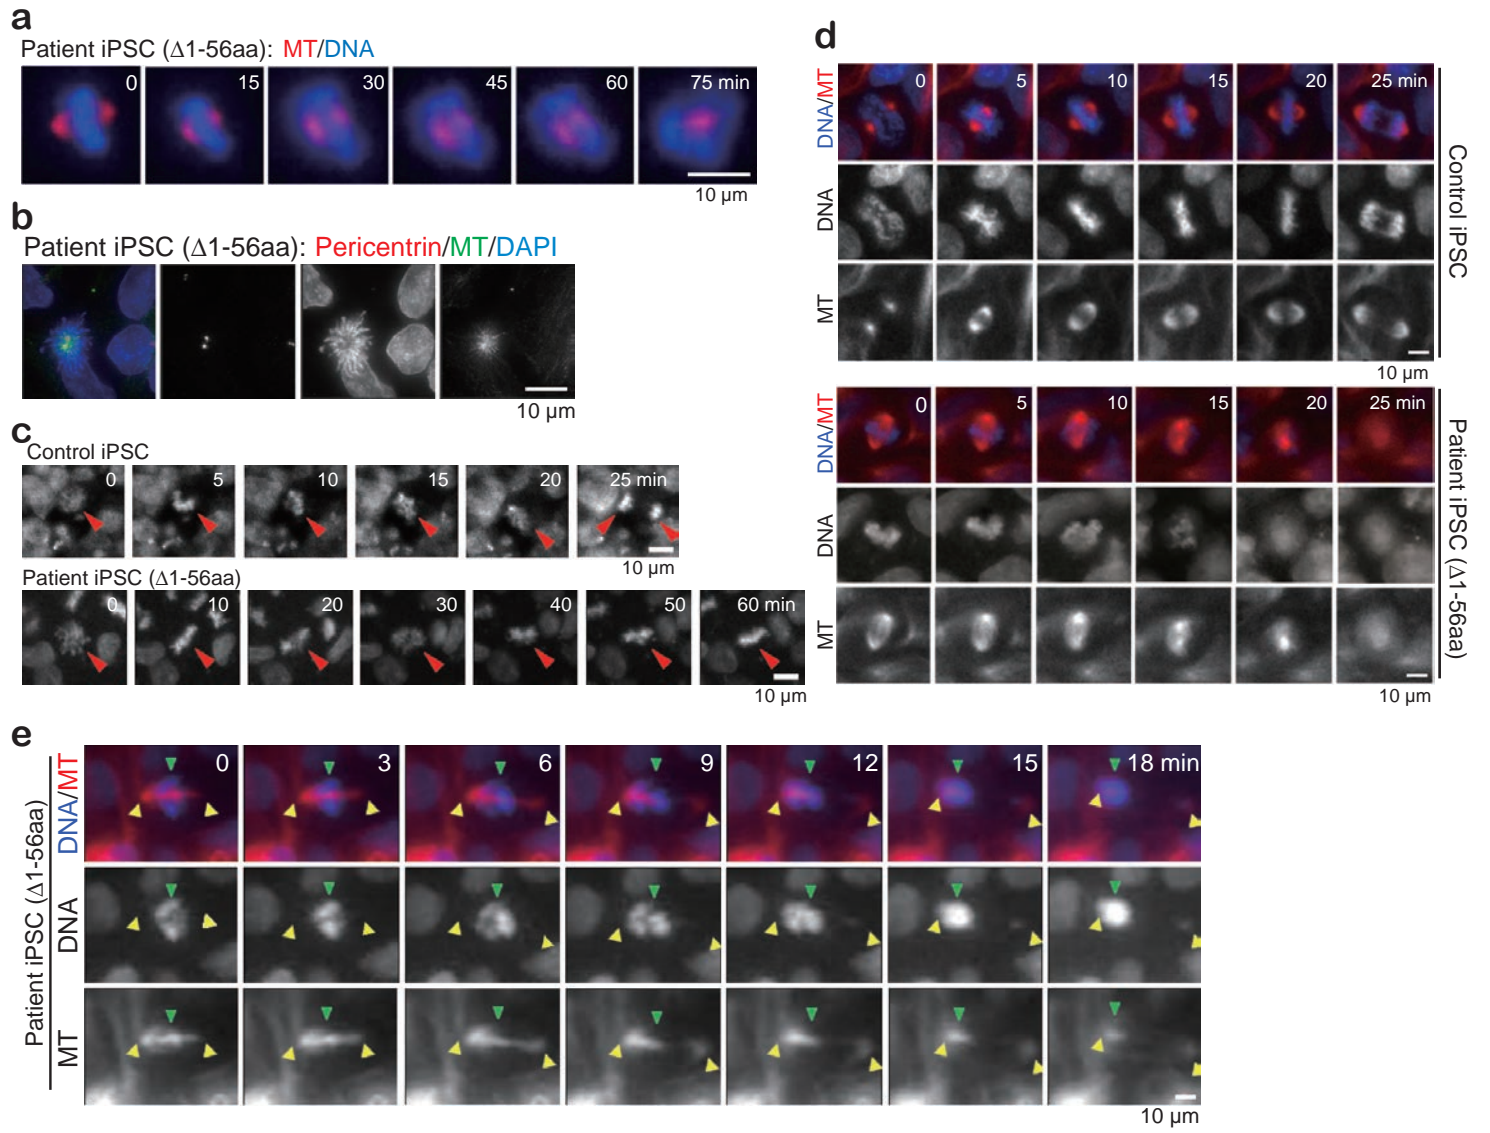

Jin and Pomp et al., Supplementary Figure S4:

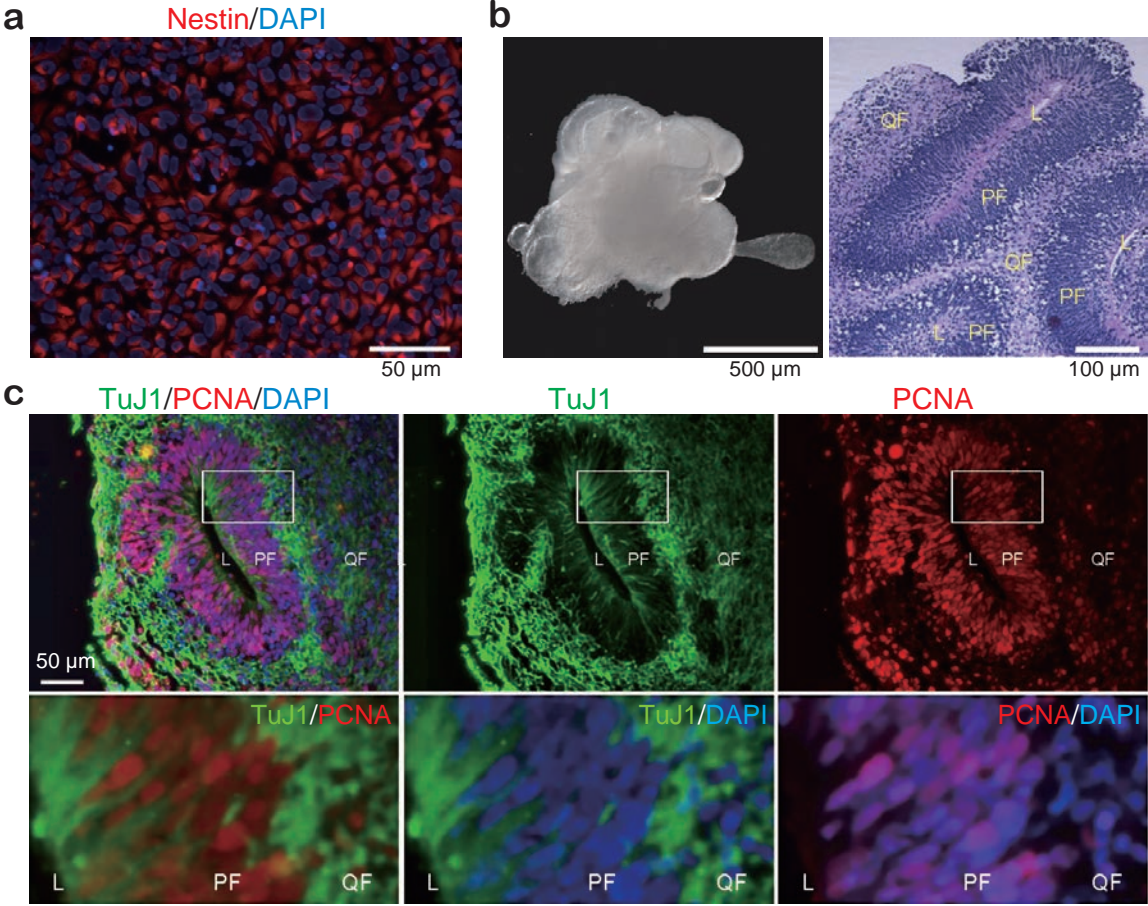

Jin and Pomp et al., Supplementary Figure S5:

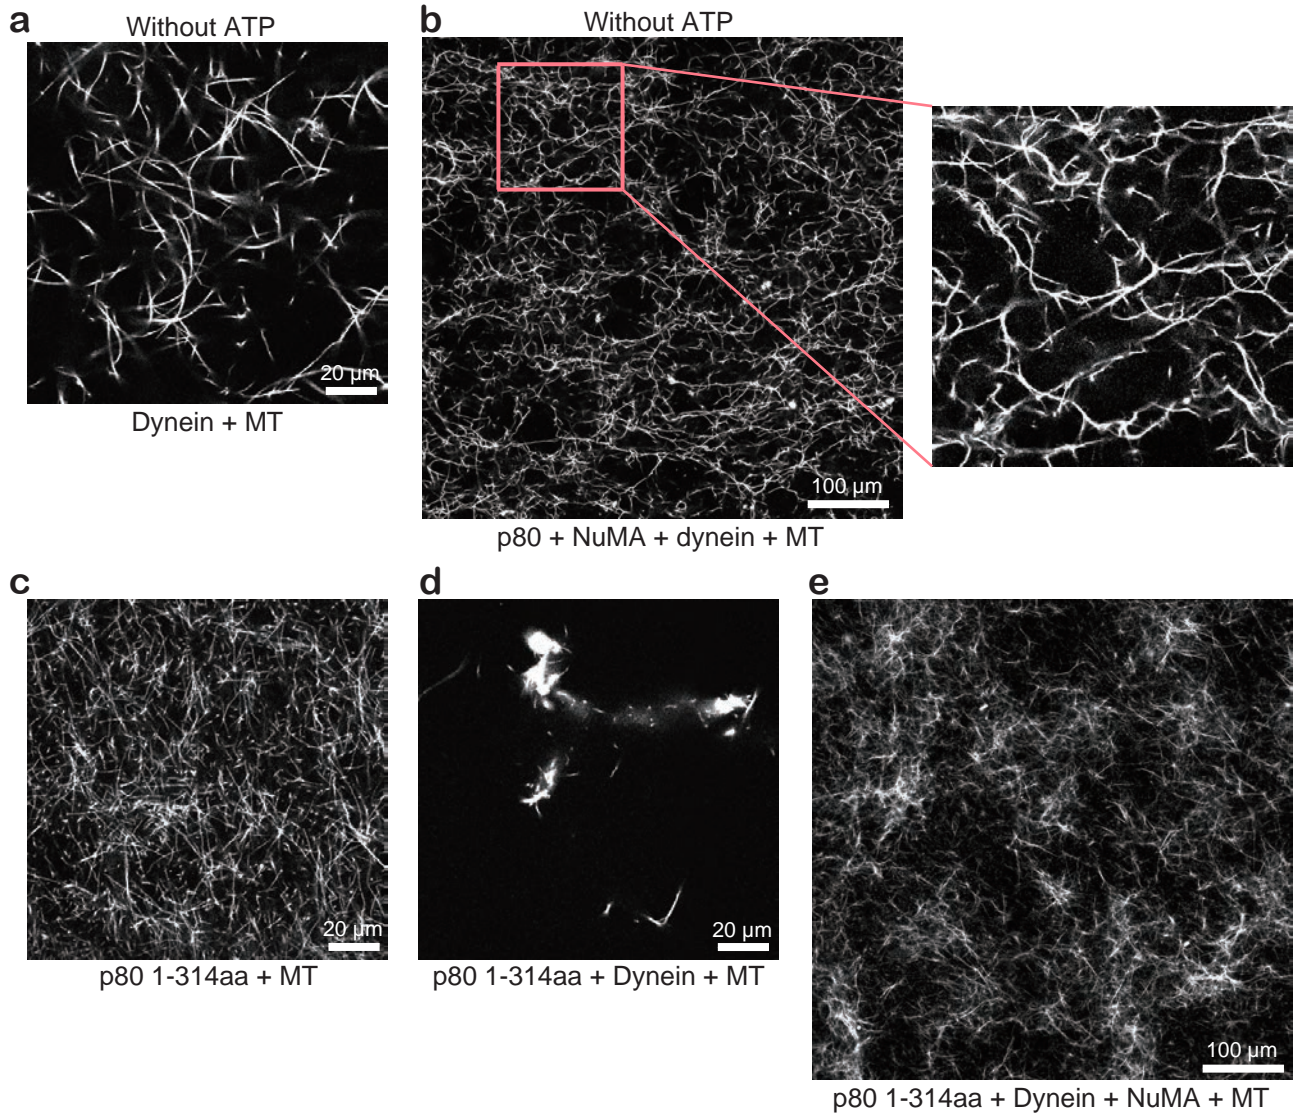

# Jin and Pomp et al., Supplementary Table S1

## Katanin p80

MS/MS Fragmentation of SLTGHTSPVESVR found in katanin p80 WD40 repeat-containing subunit B1

### Fragmentation Evidence

| Residue | b        | b-H <sub>2</sub> O | b-H <sub>3</sub> PO <sub>4</sub> | b-NH <sub>3</sub> | b-OH     | y        | y-H <sub>2</sub> O | y-H <sub>3</sub> PO <sub>4</sub> | y-NH <sub>3</sub> |
|---------|----------|--------------------|----------------------------------|-------------------|----------|----------|--------------------|----------------------------------|-------------------|
| S       | 88.0393  | 70.0287            |                                  | 71.0128           | 71.0366  | 1369.707 | 1351.697           | 1271.73                          | 1352.681          |
| L       | 201.1234 | 183.1128           | 103.1465                         | 184.0968          | 184.1206 | 1282.675 | 1264.664           | 1184.698                         | 1265.648          |
| T       | 302.171  | 284.1605           | 204.1942                         | 285.1445          | 285.1683 | 1169.591 | 1151.58            | 1071.614                         | 1152.564          |
| G       | 359.1925 | 341.1819           | 261.2156                         | 342.166           | 342.1898 | 1068.543 | 1050.533           | 970.5664                         | 1051.517          |
| H       | 496.2514 | 478.2409           | 398.2745                         | 479.2249          | 479.2487 | 1011.522 | 993.5112           | 913.5449                         | 994.4952          |
| T       | 597.2991 | 579.2885           | 499.3222                         | 580.2726          | 580.2964 | 874.4629 | 856.4523           | 776.486                          | 857.4363          |
| S       | 684.3311 | 666.3206           | 586.3542                         | 667.3046          | 667.3284 | 773.4152 | 755.4046           | 675.4383                         | 756.3886          |
| P       | 781.3839 | 763.3733           | 683.407                          | 764.3573          | 764.3812 | 686.3832 | 668.3726           | 588.4063                         | 669.3566          |
| V       | 880.4523 | 862.4417           | 782.4754                         | 863.4258          | 863.4496 | 589.3304 | 571.3198           | 491.3535                         | 572.3039          |
| E       | 1009.495 | 991.4843           | 911.518                          | 992.4684          | 992.4922 | 490.262  | 472.2514           | 392.2851                         | 473.2354          |
| S       | 1096.527 | 1078.516           | 998.55                           | 1079.5            | 1079.524 | 361.2194 | 343.2088           | 263.2425                         | 344.1928          |
| V       | 1195.595 | 1177.585           | 1097.618                         | 1178.569          | 1178.593 | 274.1874 | 256.1768           | 176.2105                         | 257.1608          |
| R       | 1351.697 | 1333.686           | 1253.72                          | 1334.67           | 1334.694 | 175.119  | 157.1084           | 77.1421                          | 158.0924          |

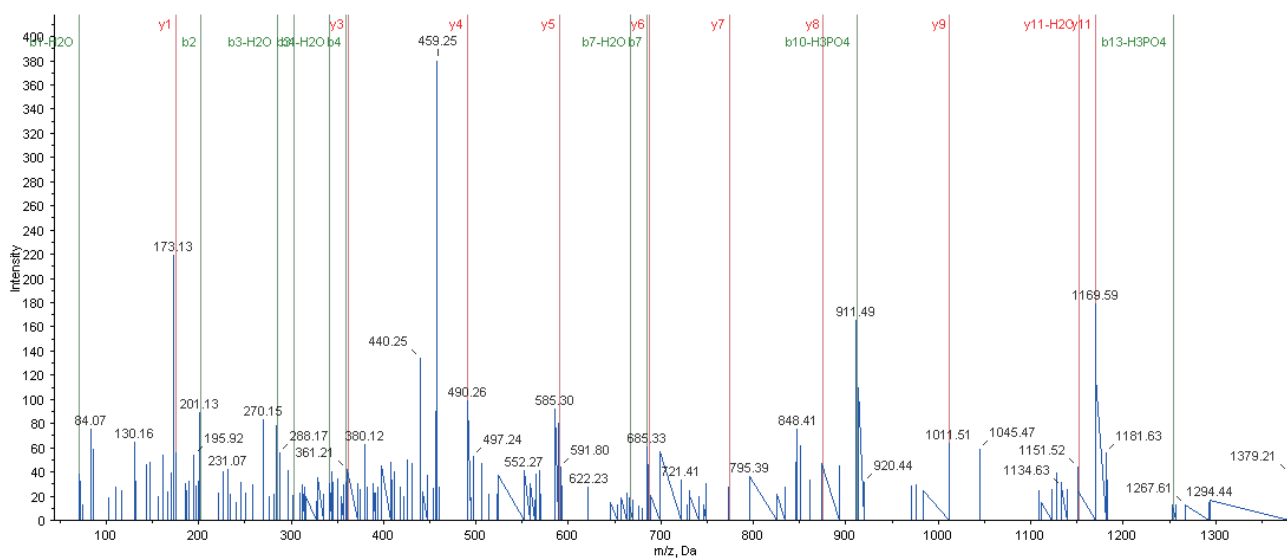

## Cytoplasmic dynein

MS/MS Fragmentation of AISKDHLYGTLPNTR found in cytoplasmic dynein 1 heavy chain 1

### Fragmentation Evidence

| Residue | b        | b-H <sub>2</sub> O | b-H <sub>3</sub> PO <sub>4</sub> | b-NH <sub>3</sub> | b-OH     | y        | y-H <sub>2</sub> O | y-H <sub>3</sub> PO <sub>4</sub> | y-NH <sub>3</sub> |
|---------|----------|--------------------|----------------------------------|-------------------|----------|----------|--------------------|----------------------------------|-------------------|
| A       | 72.0444  | 54.0338            |                                  | 55.0178           | 55.0417  | 1800.924 | 1782.913           | 1702.947                         | 1783.897          |
| I       | 185.1285 | 167.1179           | 87.1516                          | 168.1019          | 168.1257 | 1729.887 | 1711.876           | 1631.91                          | 1712.86           |
| S       | 272.1605 | 254.1499           | 174.1836                         | 255.1339          | 255.1577 | 1616.803 | 1598.792           | 1518.826                         | 1599.776          |
| K       | 400.2554 | 382.2449           | 302.2786                         | 383.2289          | 383.2527 | 1529.771 | 1511.76            | 1431.794                         | 1512.744          |
| D       | 515.2824 | 497.2718           | 417.3055                         | 498.2558          | 498.2796 | 1401.676 | 1383.665           | 1303.699                         | 1384.649          |
| H       | 652.3413 | 634.3307           | 554.3644                         | 635.3148          | 635.3386 | 1286.649 | 1268.638           | 1188.672                         | 1269.622          |
| L       | 765.4254 | 747.4148           | 667.4485                         | 748.3988          | 748.4226 | 1149.59  | 1131.579           | 1051.613                         | 1132.563          |
| Y       | 928.4887 | 910.4781           | 830.5118                         | 911.4621          | 911.486  | 1036.506 | 1018.495           | 938.5289                         | 1019.479          |
| G       | 985.5102 | 967.4996           | 887.5333                         | 968.4836          | 968.5074 | 873.4425 | 855.4319           | 775.4656                         | 856.4159          |
| T       | 1086.558 | 1068.547           | 988.5809                         | 1069.531          | 1069.555 | 816.421  | 798.4104           | 718.4441                         | 799.3945          |
| L       | 1199.642 | 1181.631           | 1101.665                         | 1182.615          | 1182.639 | 715.3733 | 697.3628           | 617.3964                         | 698.3468          |
| D       | 1314.669 | 1296.658           | 1216.692                         | 1297.642          | 1297.666 | 602.2893 | 584.2787           | 504.3124                         | 585.2627          |
| P       | 1411.722 | 1393.711           | 1313.745                         | 1394.695          | 1394.719 | 487.2623 | 469.2518           | 389.2854                         | 470.2358          |
| N       | 1525.765 | 1507.754           | 1427.788                         | 1508.738          | 1508.762 | 390.2096 | 372.199            | 292.2327                         | 373.183           |
| T       | 1626.812 | 1608.802           | 1528.835                         | 1609.786          | 1609.81  | 276.1666 | 258.1561           | 178.1897                         | 259.1401          |
| R       | 1782.913 | 1764.903           | 1684.936                         | 1765.887          | 1765.911 | 175.119  | 157.1084           | 77.1421                          | 158.0924          |

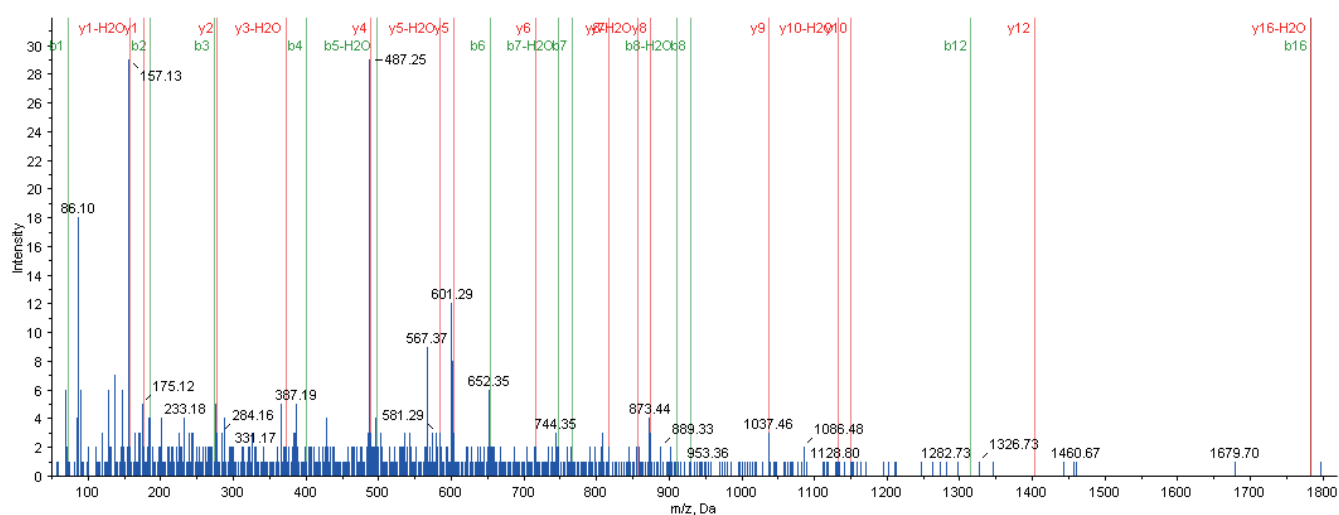

# Cytoplasmic dynein 1 light intermediate chain 2

## MS/MS Fragmentation of KTGSPGSPSAGGVQSTAK found in cytoplasmic dynein 1 light intermediate chain 2

### Fragmentation Evidence

| Residue | b        | b-H2O    | b-H3PO4  | b-NH3    | b-OH     | y        | y-H2O    | y-H3PO4  | y-NH3    |
|---------|----------|----------|----------|----------|----------|----------|----------|----------|----------|
| K       | 129.1022 | 111.0917 | 31.1253  | 112.0757 | 112.0995 | 1616.824 | 1598.813 | 1518.847 | 1599.797 |
| T       | 230.1499 | 212.1394 | 132.173  | 213.1234 | 213.1472 | 1488.729 | 1470.718 | 1390.752 | 1471.702 |
| G       | 287.1714 | 269.1608 | 189.1945 | 270.1448 | 270.1686 | 1387.681 | 1369.671 | 1289.704 | 1370.655 |
| S       | 374.2034 | 356.1928 | 276.2265 | 357.1769 | 357.2007 | 1330.66  | 1312.649 | 1232.683 | 1313.633 |
| P       | 471.2562 | 453.2456 | 373.2793 | 454.2296 | 454.2534 | 1243.628 | 1225.617 | 1145.651 | 1226.601 |
| G       | 528.2776 | 510.2671 | 430.3007 | 511.2511 | 511.2749 | 1146.575 | 1128.564 | 1048.598 | 1129.548 |
| S       | 615.3097 | 597.2991 | 517.3328 | 598.2831 | 598.3069 | 1089.554 | 1071.543 | 991.5766 | 1072.527 |
| P       | 712.3624 | 694.3519 | 614.3855 | 695.3359 | 695.3597 | 1002.521 | 984.5109 | 904.5446 | 985.4949 |
| S       | 799.3945 | 781.3839 | 701.4176 | 782.3679 | 782.3917 | 905.4687 | 887.4581 | 807.4918 | 888.4421 |
| A       | 870.4316 | 852.421  | 772.4547 | 853.405  | 853.4288 | 818.4367 | 800.4261 | 720.4598 | 801.4101 |
| G       | 927.453  | 909.4425 | 829.4761 | 910.4265 | 910.4503 | 747.3995 | 729.389  | 649.4226 | 730.373  |
| G       | 984.4745 | 966.4639 | 886.4976 | 967.448  | 967.4718 | 690.3781 | 672.3675 | 592.4012 | 673.3515 |
| V       | 1083.543 | 1065.532 | 985.566  | 1066.516 | 1066.54  | 633.3566 | 615.3461 | 535.3797 | 616.3301 |
| Q       | 1211.602 | 1193.591 | 1113.625 | 1194.575 | 1194.599 | 534.2882 | 516.2776 | 436.3113 | 517.2617 |
| S       | 1298.634 | 1280.623 | 1200.657 | 1281.607 | 1281.631 | 406.2296 | 388.2191 | 308.2527 | 389.2031 |
| T       | 1399.681 | 1381.671 | 1301.704 | 1382.655 | 1382.679 | 319.1976 | 301.187  | 221.2207 | 302.171  |
| A       | 1470.718 | 1452.708 | 1372.741 | 1453.692 | 1453.716 | 218.1499 | 200.1394 | 120.173  | 201.1234 |
| K       | 1598.813 | 1580.803 | 1500.836 | 1581.787 | 1581.811 | 147.1128 | 129.1022 | 49.1359  | 130.0863 |

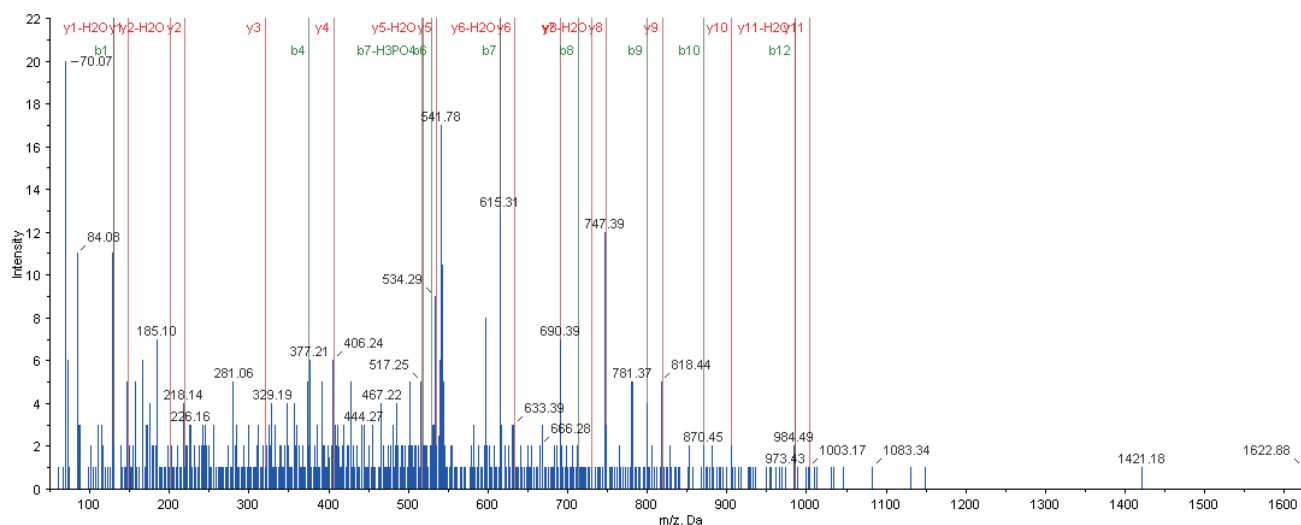



# NuMA1

## MS/MS Fragmentation of HELAEATASQHR found in nuclear mitotic apparatus protein 1

### Fragmentation Evidence

| Residue | b        | b-H <sub>2</sub> O | b-H <sub>3</sub> PO <sub>4</sub> | b-NH <sub>3</sub> | b-OH     | y        | y-H <sub>2</sub> O | y-H <sub>3</sub> PO <sub>4</sub> | y-NH <sub>3</sub> |
|---------|----------|--------------------|----------------------------------|-------------------|----------|----------|--------------------|----------------------------------|-------------------|
| H       | 138.0662 | 120.0556           | 40.0893                          | 121.0396          | 121.0634 | 1349.656 | 1331.645           | 1251.679                         | 1332.629          |
| E       | 267.1088 | 249.0982           | 169.1319                         | 250.0822          | 250.106  | 1212.597 | 1194.586           | 1114.62                          | 1195.57           |
| L       | 380.1928 | 362.1823           | 282.216                          | 363.1663          | 363.1901 | 1083.554 | 1065.544           | 985.5773                         | 1066.528          |
| A       | 451.23   | 433.2194           | 353.2531                         | 434.2034          | 434.2272 | 970.4701 | 952.4595           | 872.4932                         | 953.4435          |
| E       | 580.2726 | 562.262            | 482.2957                         | 563.246           | 563.2698 | 899.433  | 881.4224           | 801.4561                         | 882.4064          |
| A       | 651.3097 | 633.2991           | 553.3328                         | 634.2831          | 634.3069 | 770.3904 | 752.3798           | 672.4135                         | 753.3638          |
| T       | 752.3573 | 734.3468           | 654.3804                         | 735.3308          | 735.3546 | 699.3533 | 681.3427           | 601.3764                         | 682.3267          |
| A       | 823.3945 | 805.3839           | 725.4176                         | 806.3679          | 806.3917 | 598.3056 | 580.295            | 500.3287                         | 581.279           |
| S       | 910.4265 | 892.4159           | 812.4496                         | 893.3999          | 893.4237 | 527.2685 | 509.2579           | 429.2916                         | 510.2419          |
| Q       | 1038.485 | 1020.475           | 940.5082                         | 1021.459          | 1021.482 | 440.2364 | 422.2259           | 342.2595                         | 423.2099          |
| H       | 1175.544 | 1157.533           | 1077.567                         | 1158.517          | 1158.541 | 312.1779 | 294.1673           | 214.201                          | 295.1513          |
| R       | 1331.645 | 1313.635           | 1233.668                         | 1314.619          | 1314.642 | 175.119  | 157.1084           | 77.1421                          | 158.0924          |

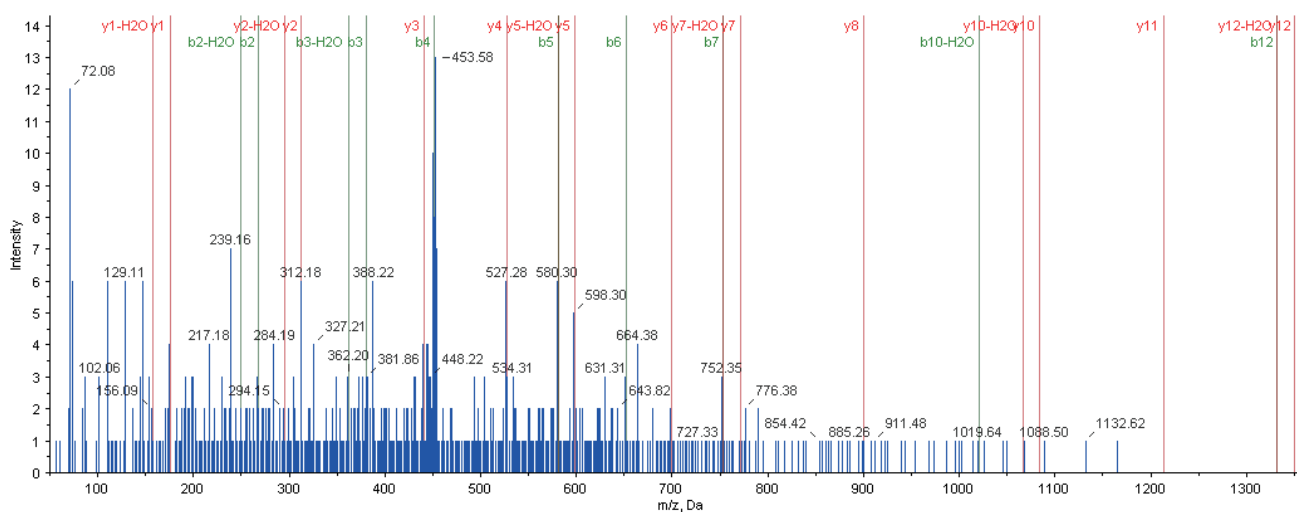

# Beta-tubulin

MS/MS Fragmentation of AILVDLEPGTMDSVR found in tubulin beta-2B chain

## Fragmentation Evidence

| Residue | b        | b-H2O    | b-H3PO4  | b-NH3    | b-OH     | y        | y-H2O    | y-H3PO4  | y-NH3    |
|---------|----------|----------|----------|----------|----------|----------|----------|----------|----------|
| A       | 72.0444  | 54.0338  |          | 55.0178  | 55.0417  | 1631.831 | 1613.82  | 1533.854 | 1614.804 |
| I       | 185.1285 | 167.1179 | 87.1516  | 168.1019 | 168.1257 | 1560.794 | 1542.783 | 1462.817 | 1543.767 |
| L       | 298.2125 | 280.202  | 200.2356 | 281.186  | 281.2098 | 1447.71  | 1429.699 | 1349.733 | 1430.683 |
| V       | 397.2809 | 379.2704 | 299.304  | 380.2544 | 380.2782 | 1334.626 | 1316.615 | 1236.649 | 1317.599 |
| D       | 512.3079 | 494.2973 | 414.331  | 495.2813 | 495.3051 | 1235.557 | 1217.547 | 1137.58  | 1218.531 |
| L       | 625.3919 | 607.3814 | 527.415  | 608.3654 | 608.3892 | 1120.53  | 1102.52  | 1022.553 | 1103.504 |
| E       | 754.4345 | 736.424  | 656.4576 | 737.408  | 737.4318 | 1007.446 | 989.4357 | 909.4693 | 990.4197 |
| P       | 851.4873 | 833.4767 | 753.5104 | 834.4607 | 834.4846 | 878.4036 | 860.3931 | 780.4267 | 861.3771 |
| G       | 908.5088 | 890.4982 | 810.5319 | 891.4822 | 891.506  | 781.3509 | 763.3403 | 683.374  | 764.3243 |
| T       | 1009.556 | 991.5459 | 911.5795 | 992.5299 | 992.5537 | 724.3294 | 706.3189 | 626.3525 | 707.3029 |
| M[Oxi]  | 1156.592 | 1138.581 | 1058.615 | 1139.565 | 1139.589 | 623.2817 | 605.2712 | 525.3048 | 606.2552 |
| D       | 1271.619 | 1253.608 | 1173.642 | 1254.592 | 1254.616 | 476.2463 | 458.2358 | 378.2694 | 459.2198 |
| S       | 1358.651 | 1340.64  | 1260.674 | 1341.624 | 1341.648 | 361.2194 | 343.2088 | 263.2425 | 344.1928 |
| V       | 1457.719 | 1439.709 | 1359.742 | 1440.693 | 1440.717 | 274.1874 | 256.1768 | 176.2105 | 257.1608 |
| R       | 1613.82  | 1595.81  | 1515.843 | 1596.794 | 1596.818 | 175.119  | 157.1084 | 77.1421  | 158.0924 |

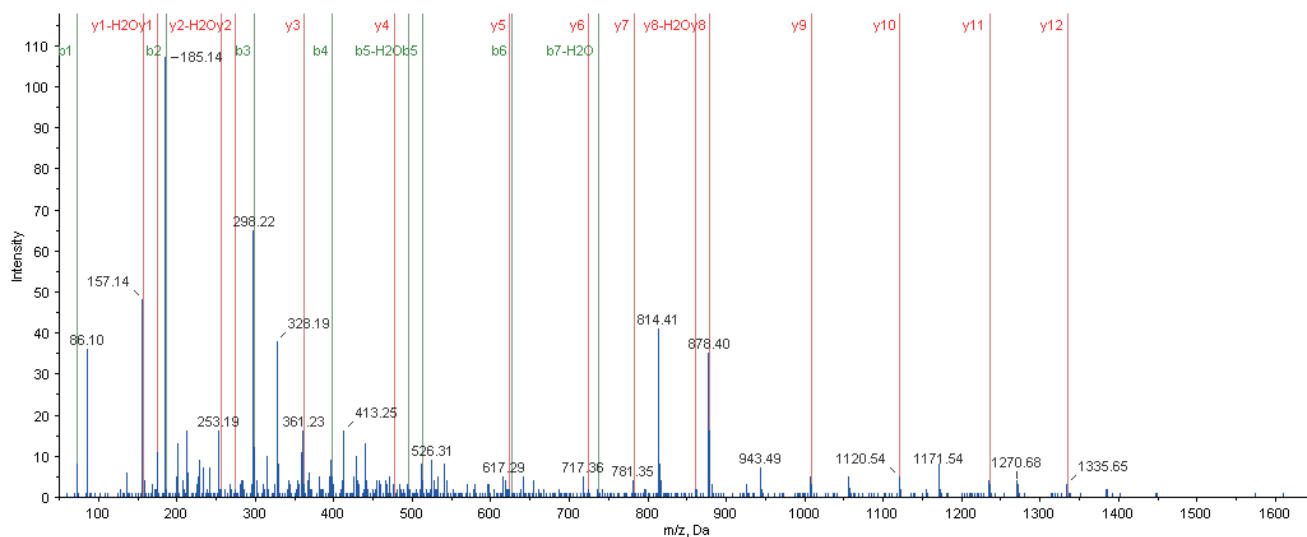

# Alpha-tubulin

MS/MS Fragmentation of AFVHWYVGEGMEEGEFSEAR found in tubulin alpha-1A chain

## Fragmentation Evidence

| Residue | b        | b-H <sub>2</sub> O | b-H <sub>3</sub> PO <sub>4</sub> | b-NH <sub>3</sub> | b-OH     | y        | y-H <sub>2</sub> O | y-H <sub>3</sub> PO <sub>4</sub> | y-NH <sub>3</sub> |
|---------|----------|--------------------|----------------------------------|-------------------|----------|----------|--------------------|----------------------------------|-------------------|
| A       | 72.0444  | 54.0338            |                                  | 55.0178           | 55.0417  | 2346.013 | 2328.003           | 2248.036                         | 2328.987          |
| F       | 219.1128 | 201.1022           | 121.1359                         | 202.0863          | 202.1101 | 2274.976 | 2256.966           | 2176.999                         | 2257.95           |
| V       | 318.1812 | 300.1707           | 220.2043                         | 301.1547          | 301.1785 | 2127.908 | 2109.897           | 2029.931                         | 2110.881          |
| H       | 455.2401 | 437.2296           | 357.2632                         | 438.2136          | 438.2374 | 2028.839 | 2010.829           | 1930.862                         | 2011.813          |
| W       | 641.3194 | 623.3089           | 543.3425                         | 624.2929          | 624.3167 | 1891.78  | 1873.77            | 1793.803                         | 1874.754          |
| Y       | 804.3828 | 786.3722           | 706.4059                         | 787.3562          | 787.38   | 1705.701 | 1687.69            | 1607.724                         | 1688.675          |
| V       | 903.4512 | 885.4406           | 805.4743                         | 886.4246          | 886.4484 | 1542.638 | 1524.627           | 1444.661                         | 1525.611          |
| G       | 960.4726 | 942.4621           | 862.4958                         | 943.4461          | 943.4699 | 1443.569 | 1425.559           | 1345.592                         | 1426.543          |
| E       | 1089.515 | 1071.505           | 991.5383                         | 1072.489          | 1072.513 | 1386.548 | 1368.537           | 1288.571                         | 1369.521          |
| G       | 1146.537 | 1128.526           | 1048.56                          | 1129.51           | 1129.534 | 1257.505 | 1239.495           | 1159.528                         | 1240.479          |
| M[Oxi]  | 1293.572 | 1275.562           | 1195.595                         | 1276.546          | 1276.569 | 1200.484 | 1182.473           | 1102.507                         | 1183.457          |
| E       | 1422.615 | 1404.604           | 1324.638                         | 1405.588          | 1405.612 | 1053.448 | 1035.438           | 955.4714                         | 1036.422          |
| E       | 1551.657 | 1533.647           | 1453.68                          | 1534.631          | 1534.655 | 924.4058 | 906.3952           | 826.4289                         | 907.3792          |
| G       | 1608.679 | 1590.668           | 1510.702                         | 1591.652          | 1591.676 | 795.3632 | 777.3526           | 697.3863                         | 778.3366          |
| E       | 1737.721 | 1719.711           | 1639.745                         | 1720.695          | 1720.719 | 738.3417 | 720.3311           | 640.3648                         | 721.3151          |
| F       | 1884.79  | 1866.779           | 1786.813                         | 1867.763          | 1867.787 | 609.2991 | 591.2885           | 511.3222                         | 592.2726          |
| S       | 1971.822 | 1953.811           | 1873.845                         | 1954.795          | 1954.819 | 462.2307 | 444.2201           | 364.2538                         | 445.2041          |
| E       | 2100.864 | 2082.854           | 2002.888                         | 2083.838          | 2083.862 | 375.1987 | 357.1881           | 277.2218                         | 358.1721          |
| A       | 2171.902 | 2153.891           | 2073.925                         | 2154.875          | 2154.899 | 246.1561 | 228.1455           | 148.1792                         | 229.1295          |
| R       | 2328.003 | 2309.992           | 2230.026                         | 2310.976          | 2311     | 175.119  | 157.1084           | 77.1421                          | 158.0924          |

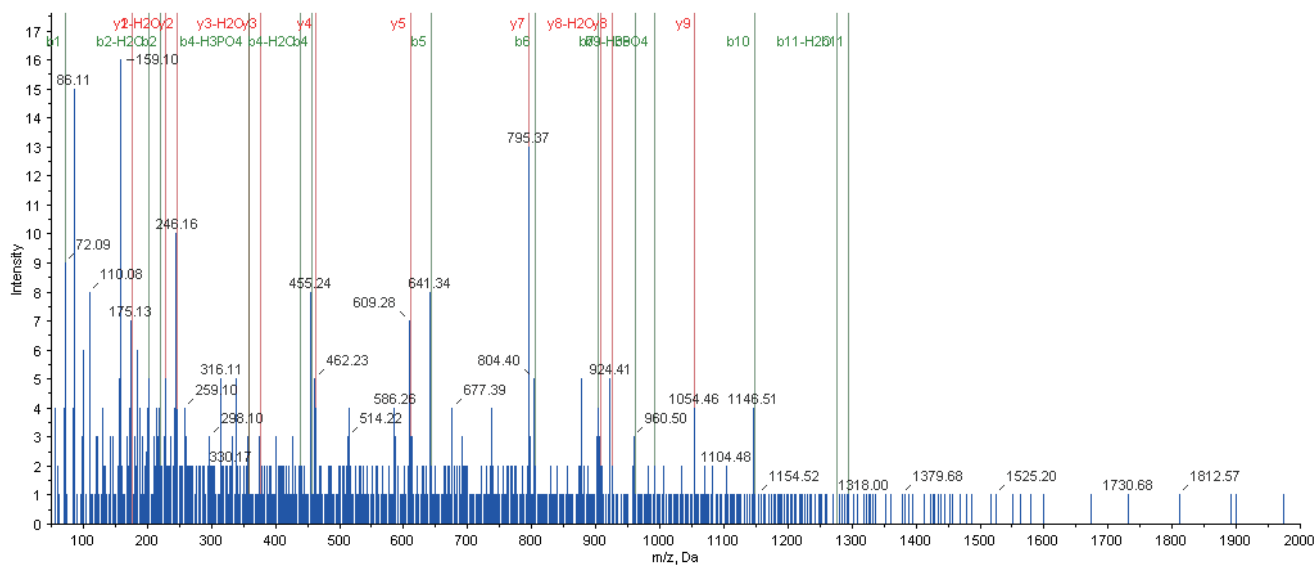

# Beta III-tubulin

MS/MS Fragmentation of FWEVISDEHGIDPSGNYVGDSLQLER found in tubulin beta-3 chain

## Fragmentation Evidence

| Residue | b        | b-H2O    | b-H3PO4  | b-NH3    | b-OH     | y        | y-H2O    | y-H3PO4  | y-NH3    |
|---------|----------|----------|----------|----------|----------|----------|----------|----------|----------|
| F       | 148.0757 | 130.0651 | 50.0988  | 131.0491 | 131.073  | 3077.412 | 3059.402 | 2979.435 | 3060.386 |
| W       | 334.155  | 316.1444 | 236.1781 | 317.1285 | 317.1523 | 2930.344 | 2912.333 | 2832.367 | 2913.317 |
| E       | 463.1976 | 445.187  | 365.2207 | 446.171  | 446.1949 | 2744.265 | 2726.254 | 2646.288 | 2727.238 |
| V       | 562.266  | 544.2554 | 464.2891 | 545.2395 | 545.2633 | 2615.222 | 2597.211 | 2517.245 | 2598.195 |
| I       | 675.3501 | 657.3395 | 577.3732 | 658.3235 | 658.3473 | 2516.154 | 2498.143 | 2418.177 | 2499.127 |
| S       | 762.3821 | 744.3715 | 664.4052 | 745.3556 | 745.3794 | 2403.07  | 2385.059 | 2305.093 | 2386.043 |
| D       | 877.409  | 859.3985 | 779.4322 | 860.3825 | 860.4063 | 2316.038 | 2298.027 | 2218.061 | 2299.011 |
| E       | 1006.452 | 988.4411 | 908.4747 | 989.4251 | 989.4489 | 2201.011 | 2183     | 2103.034 | 2183.984 |
| H       | 1143.511 | 1125.5   | 1045.534 | 1126.484 | 1126.508 | 2071.968 | 2053.957 | 1973.991 | 2054.941 |
| G       | 1200.532 | 1182.521 | 1102.555 | 1183.506 | 1183.529 | 1934.909 | 1916.899 | 1836.932 | 1917.883 |
| I       | 1313.616 | 1295.606 | 1215.639 | 1296.59  | 1296.613 | 1877.888 | 1859.877 | 1779.911 | 1860.861 |
| D       | 1428.643 | 1410.633 | 1330.666 | 1411.617 | 1411.64  | 1764.804 | 1746.793 | 1666.827 | 1747.777 |
| P       | 1525.696 | 1507.685 | 1427.719 | 1508.669 | 1508.693 | 1649.777 | 1631.766 | 1551.8   | 1632.75  |
| S       | 1612.728 | 1594.717 | 1514.751 | 1595.701 | 1595.725 | 1552.724 | 1534.713 | 1454.747 | 1535.697 |
| G       | 1669.749 | 1651.739 | 1571.772 | 1652.723 | 1652.747 | 1465.692 | 1447.681 | 1367.715 | 1448.665 |
| N       | 1783.792 | 1765.782 | 1685.815 | 1766.766 | 1766.79  | 1408.67  | 1390.66  | 1310.693 | 1391.644 |
| Y       | 1946.856 | 1928.845 | 1848.879 | 1929.829 | 1929.853 | 1294.627 | 1276.617 | 1196.651 | 1277.601 |
| V       | 2045.924 | 2027.913 | 1947.947 | 2028.897 | 2028.921 | 1131.564 | 1113.554 | 1033.587 | 1114.538 |
| G       | 2102.945 | 2084.935 | 2004.969 | 2085.919 | 2085.943 | 1032.496 | 1014.485 | 934.5187 | 1015.469 |
| D       | 2217.972 | 2199.962 | 2119.996 | 2200.946 | 2200.97  | 975.4742 | 957.4636 | 877.4973 | 958.4476 |
| S       | 2305.004 | 2286.994 | 2207.028 | 2287.978 | 2288.002 | 860.4472 | 842.4367 | 762.4703 | 843.4207 |
| D       | 2420.031 | 2402.021 | 2322.054 | 2403.005 | 2403.029 | 773.4152 | 755.4046 | 675.4383 | 756.3886 |
| L       | 2533.115 | 2515.105 | 2435.139 | 2516.089 | 2516.113 | 658.3883 | 640.3777 | 560.4114 | 641.3617 |
| Q       | 2661.174 | 2643.163 | 2563.197 | 2644.147 | 2644.171 | 545.3042 | 527.2936 | 447.3273 | 528.2776 |
| L       | 2774.258 | 2756.248 | 2676.281 | 2757.232 | 2757.255 | 417.2456 | 399.235  | 319.2687 | 400.2191 |
| E       | 2903.301 | 2885.29  | 2805.324 | 2886.274 | 2886.298 | 304.1615 | 286.151  | 206.1847 | 287.135  |
| R       | 3059.402 | 3041.391 | 2961.425 | 3042.375 | 3042.399 | 175.119  | 157.1084 | 77.1421  | 158.0924 |

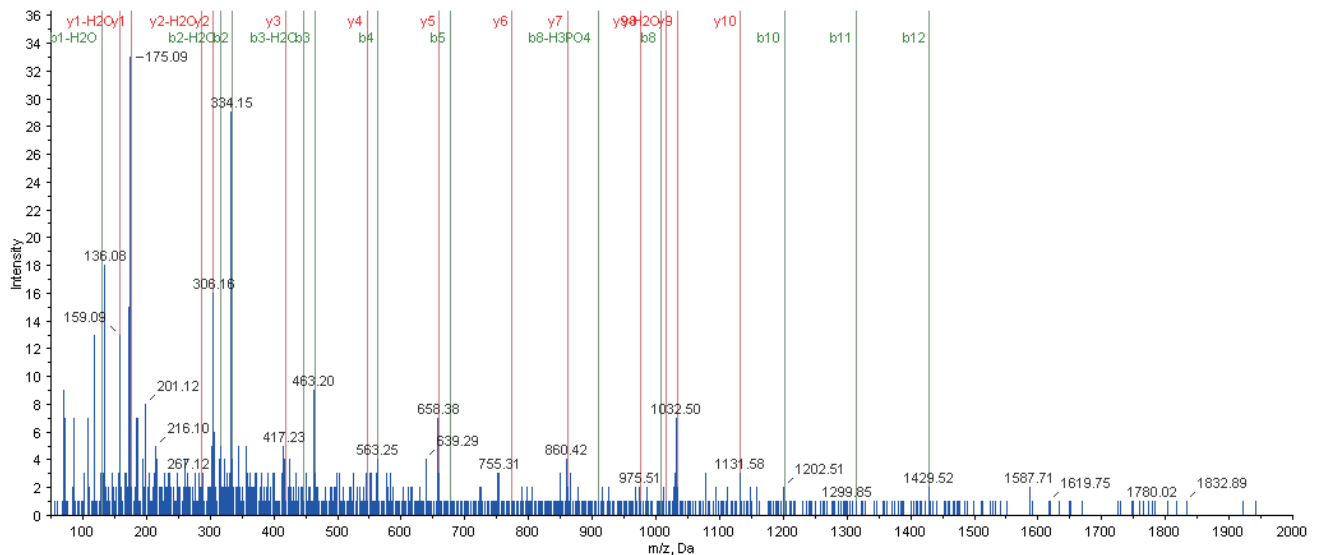

Supplement: srep39902-s16.pdf [file srep39902-s16.pdf]
